# Supplementary material
Source: bioRxiv or medRxiv preprint supplement (https://medrxiv.org/content/medrxiv/early/2020/10/14/2020.10.13.20183111/DC1/embed/media-1.pdf)
Supplement: Supplementary file [file media-1.pdf]

1 **A delayed modulation of solar radiation on the**  
2 **COVID-19 transmission reflects an incubation period**

3 **Maosheng He** <sup>1,†</sup>, **Keyan Fang** <sup>2,3,\*†</sup>, **Feifei Zhou**<sup>2</sup>, **Tinghai Ou**<sup>3</sup>, and **Deliang Chen** <sup>3</sup>

4 <sup>1</sup>The department of Physics and Earth Sciences, Jacobs University Bremen, Campus Ring 1, 28759 Bremen,  
5 Germany

6 <sup>2</sup>Key Laboratory of Humid Subtropical Eco-geographical Process (Ministry of Education), Fujian Normal University,  
7 Fuzhou 350007, China

8 <sup>3</sup>Regional Climate Group, Department of Earth Sciences, University of Gothenburg, Gothenburg 460, Sweden

9 \*Communication to [kujanfang@gmail.com](mailto:kujanfang@gmail.com)

10 †these authors contributed equally to this work

11

12

13 **This supplementary information comprises three figures**

14 Figures S1 to S3

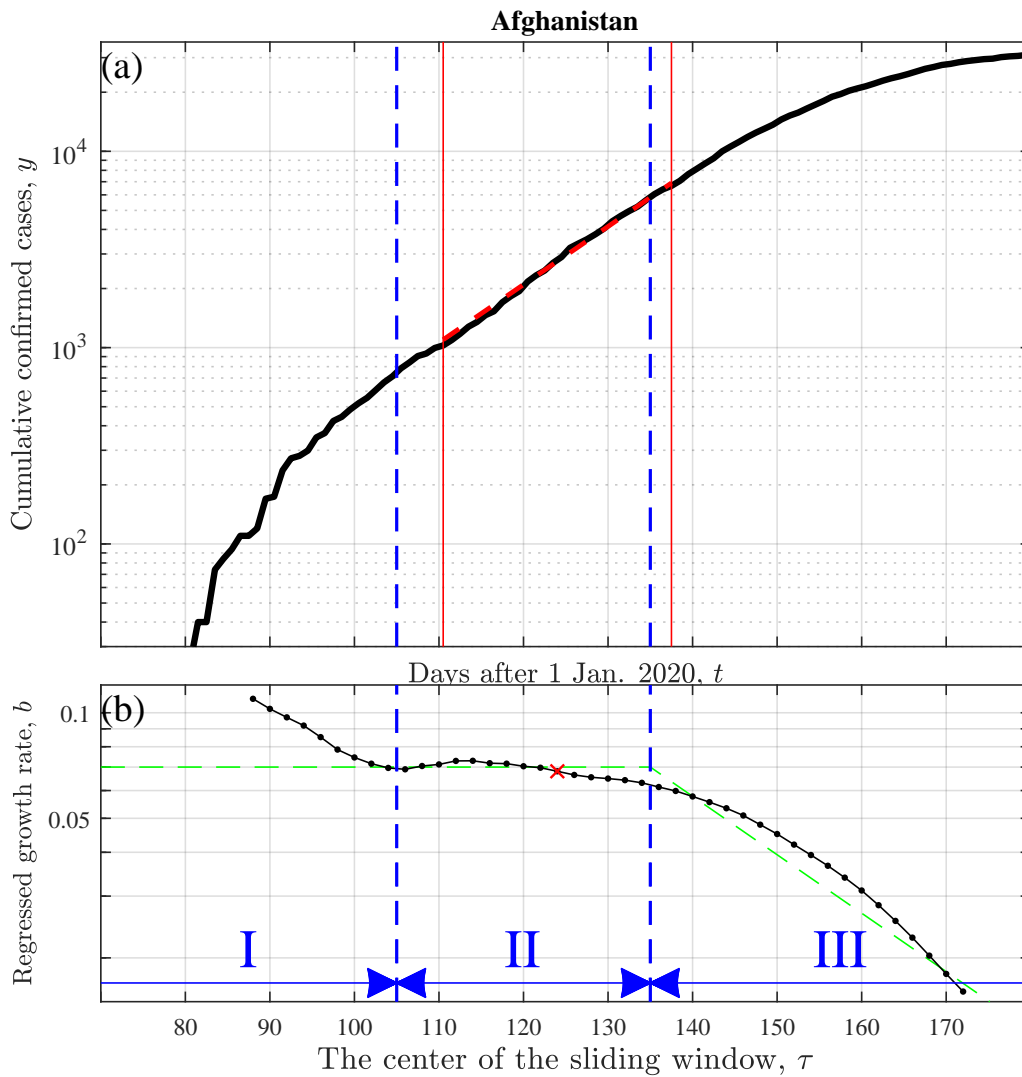

**Figure S1.** (a) Cumulative confirmed cases  $y$  as a function of time  $t$  and (b) its growth rate  $b$  against the regression time parameter  $\tau$ , for Afghanistan as an example. The growth rate  $b$  (black line in (b)) is regressed according to the model  $y = ae^{b(t-\tau)}$  in a 28day-wide sliding window centering at  $\tau=88, 90, \dots, 172$ , where  $a$  represents the model initial confirmed cases (namely, the regressed  $y$  value at  $\tau$ ). The growth of confirmed cases could be divided into three stages: Phases I, II and III, separated largely by the vertical dashed blue lines. In Phase II, the growth is stable ( $0.060 < b < 0.075$ ) whereas in the other two,  $b$  decreases by more than 0.04. In Phases II and III but not in Phase I, the realistic growth is largely consistent with the ideal evolution that is sketched as the green line in (b) according to, e.g.<sup>1,2</sup>. We attribute the discrepancy in Phase I to an insufficient test capability at early stage. In both panels, the red symbols denote the regression associated with the least-constrained growth rate, namely, the maximum  $b$  at  $a > 2500$  (see "Methods"). Note that the conclusions of the current work are qualitative not subject to the window size here, learn from the same analyses but with different window sizes from 16 to 60 days (not displayed here).

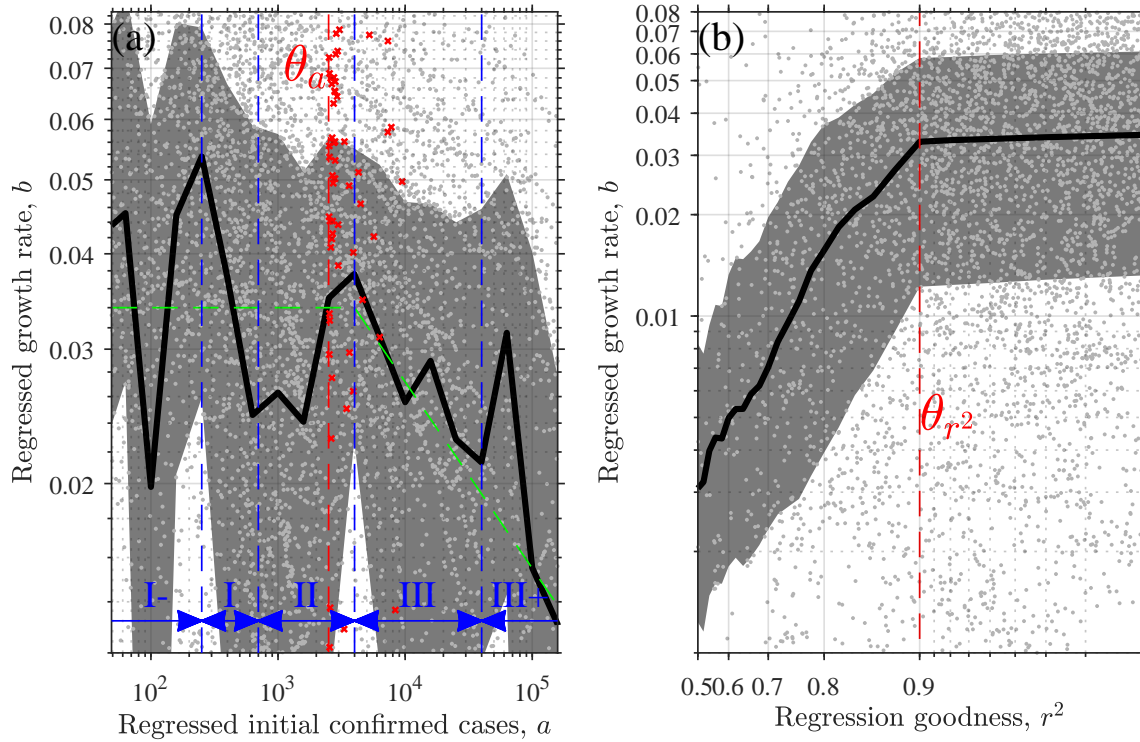

**Figure S2.** The growth rate  $b$  of the confirmed cases against (a) the regressed initial confirmed cases  $a$  and (b) the goodness  $r^2$  of the exponential regression as instanced in Figure S1. In each panel, one dot corresponds to one sliding step of the regression; and the bold black solid line and gray shadow illustrate the median and the interquartile range, respectively. In (a), the blue lines suggest different stages of the evolution of the outbreak, whereas the green line sketches the ideal evolution according to, e.g.<sup>2</sup>. The stages I, II and III, corresponding to Phases I, II and III in Figure S1, which are characterized by insufficient test capability, least artificial constrains, and intense artificial controllers, respectively. Different from the stages I and III, the stages I- and III+ are not associated with rapid decreases in  $b$ . The stage I- is attributable to that the growth, at an early stage and with a small number of infections, does not follow the exponential law well but is susceptible to uncertainties, while the stage III+ might reflect the second wave of the outbreak occurred in some countries, e.g.,<sup>3</sup>, after relaxing artificial controllers. In (a), the minima at  $a=100$  and  $10000$  might be signatures of data manipulation, e.g.,<sup>4</sup>, that governments might try to "control" the infection cases to cross the orders of magnitude. In (a), the red crosses denote the least-constrained growth rate  $b_m$ , each of which represents one country. The red lines display two threshold values,  $\theta_a = 2500$  in (a) and  $\theta_{r^2} = 0.9$  in (b). See "Methods" for the details.

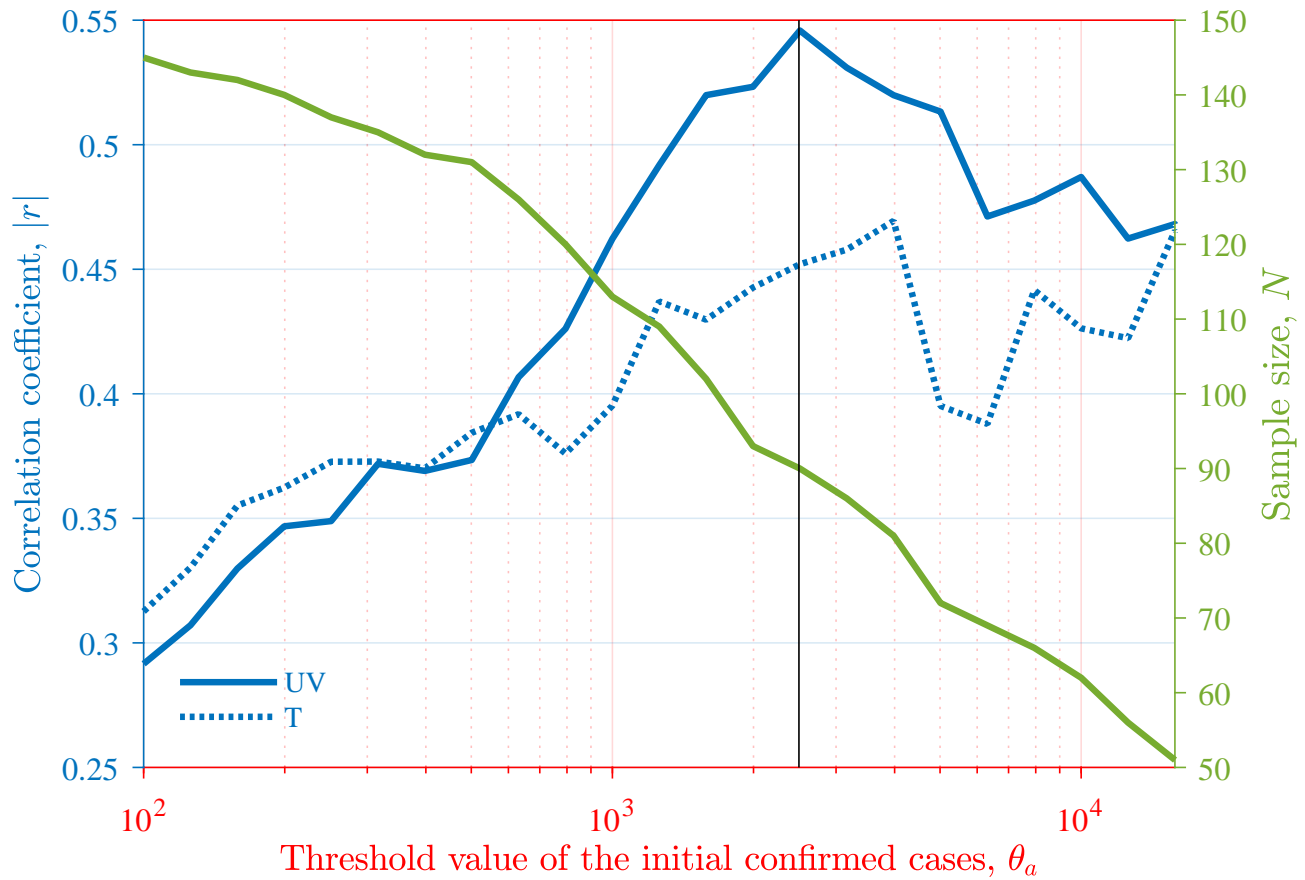

**Figure S3.** The absolute correlation coefficients  $|r|$  and valid sampling size  $N$  as a function of the threshold value  $\theta_a$  defined in Figure S2.  $\theta_a$  is the single-parameter of the optimization for determining the least-constrained growth rate. The black line represents solution of the optimization. See "Methods" for the details.

**References**

- 15 **1.** Liu, Y., Gayle, A. A., Wilder-Smith, A. & Rocklöv, J. The reproductive number of COVID-19 is higher compared to SARS  
16 coronavirus. *J. Travel. Med.* **27**, DOI: [10.1093/jtm/taaa021](https://doi.org/10.1093/jtm/taaa021) (2020).
- 17 **2.** Anderson, R. M., Anderson, B. & May, R. M. *Infectious diseases of humans: dynamics and control* (Oxford university  
18 press, 1992).
- 19 **3.** Strzelecki, A. The second worldwide wave of interest in coronavirus since the covid-19 outbreaks in south korea, italy and  
20 iran: A google trends study. *Brain, Behav. Immun.* **88**, 950–951, DOI: [10.1016/j.bbi.2020.04.042](https://doi.org/10.1016/j.bbi.2020.04.042) (2020).
- 21 **4.** Kapoor, M., Malani, A., Ravi, S. & Agrawal, A. Authoritarian governments appear to manipulate covid data (2020).  
22 [2007.09566](https://doi.org/10.21203/rs.3.rs-1007095/v1).
- 23
